# Supplementary material for: Hepatitis C Virus Epidemiology in Djibouti, Somalia, Sudan, and Yemen: Systematic Review and Meta-Analysis
Source: PubMed Central journal article supplement (PMC4764686; doi:10.1371/journal.pone.0149966), 2016-02-22
Supplement: pone.0149966.s003.pdf [file pone.0149966.s003.pdf]

**S2 Table.** Search criteria for the systematic review of HCV antibody prevalence in Djibouti, Somalia, Sudan, and Yemen.

**PubMed (last searched: May 17, 2015)**

("Hepatitis C"[Mesh] OR "Hepatitis C Antibodies"[Mesh] OR "Hepatitis C Antigens"[Mesh] OR "Hepacivirus"[Mesh] OR "Hepatitis C, chronic/epidemiology"[Mesh] OR "Hepatitis C, chronic/etiology"[Mesh] OR "Hepatitis C, chronic/transmission"[Mesh] OR "Hepatitis C, chronic/virology"[Mesh] OR "Hepatitis C"[Text] OR "HCV"[Text] OR "Hepatitis"[Text] OR "VHC"[Text] OR "HVC"[Text]) AND ("Yemen"[Mesh] OR "Djibouti"[Mesh] OR "Somalia"[Mesh] OR "Sudan"[Mesh] OR "Africa"[Mesh] OR "Yemen"[Text] OR "Yemeni"[Text] OR "Djibouti"[Text] OR "Somalia"[Text] OR "Somali"[Text] OR "Sudan"[Text] OR "Sudanese"[Text] OR "Africa"[Text] OR "African"[Text])

**Embase (last searched: May 17, 2015)**

(Yemen\*.mp. or exp Yemen/ or Djibouti.mp. or exp Djibouti/ or Somali\*.mp. or exp Somalia/ or Sudan\*.mp. or exp Sudan/ or Africa\*.mp. or exp Africa/) AND (exp hepatitis C/ or exp Hepatitis C virus/ or hepatitis C.mp. or HCV.mp. or hepacivirus.mp. or Hepatitis.mp. or VHC.mp. or HVC.mp.)

**Regional databases**

1. **WHO African Index Medicus (last searched: May 17, 2015)**

Djibouti; Somalia; Sudan; Yemen

2. **Index Medicus for the Eastern Mediterranean Region (last searched: May 17, 2015)**

Djibouti; Somalia; Sudan; Yemen

3. **Middle East and North Africa HIV/AIDS Epidemiology Synthesis Project database (last searched: April 14, 2015)**

All country-level and international organizations' reports for Djibouti, Somalia, Sudan, and Yemen available in the database.

**Abstract archives of the International AIDS Society conferences (last searched: May 17, 2015)**

Djibouti; Somalia; Sudan; Yemen
